# Supplementary material for: Hydrothermal synthesis and characterization of metal–organic networks with helical units in a mixed ligand system
Source: Royal Society of Chemistry journal article supplement (doi:10.1039/b800255j), 2008-01-01
Supplement: b800255j.pdf [file b800255j.pdf]

## **Supporting Information**

### **Hydrothermal Synthesis and Characterization of Metal-Organic Networks with Helical Units in Mixed Ligand System**

Yawei Hu, Guanghua Li, Xiaomin Liu, Minghui Bi, Lu Gao, Zhan Shi\* and Shouhua Feng

*State Key Laboratory of Inorganic Synthesis and Preparative Chemistry, College of Chemistry, Jilin University, Changchun 130012, People's Republic of China*

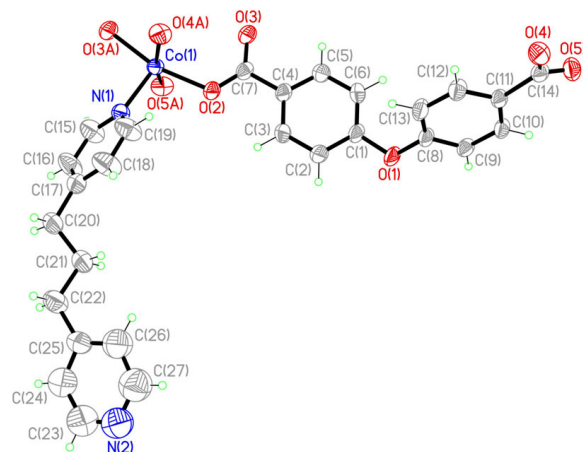

**Fig. S1.** ORTEP drawing of the asymmetric units of **1**. (thermal ellipsoids are shown at 50% probability)

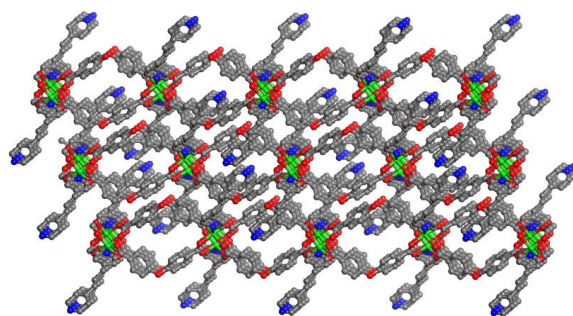

**Fig. S2.** View of the packing of **1**.

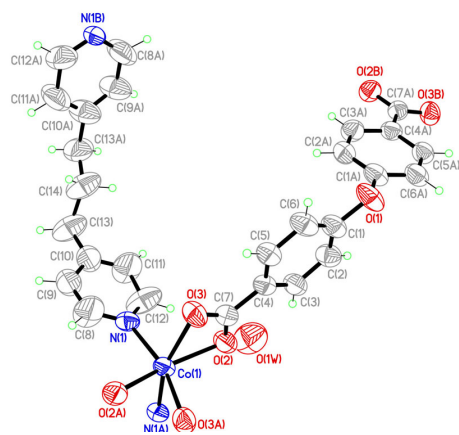

**Fig. S3.** ORTEP drawing of the asymmetric units of **2**. (thermal ellipsoids are shown at 50% probability)

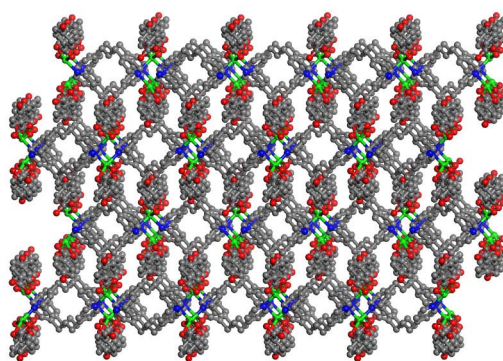

**Fig. S4.** View of the packing of **2**.

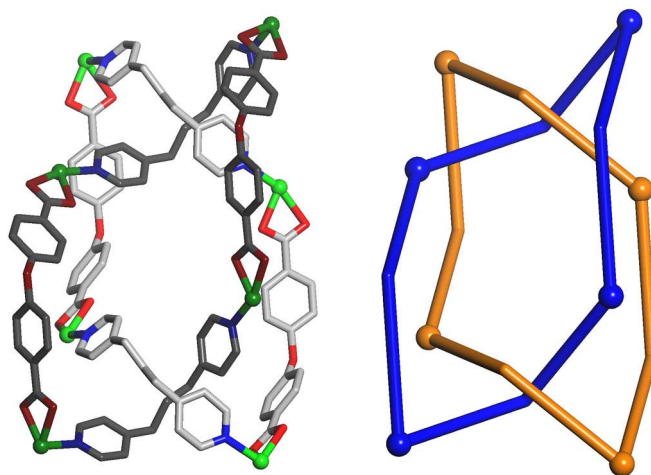

**Fig. S5.** View of two doubly catenated 4-rings of **2**.

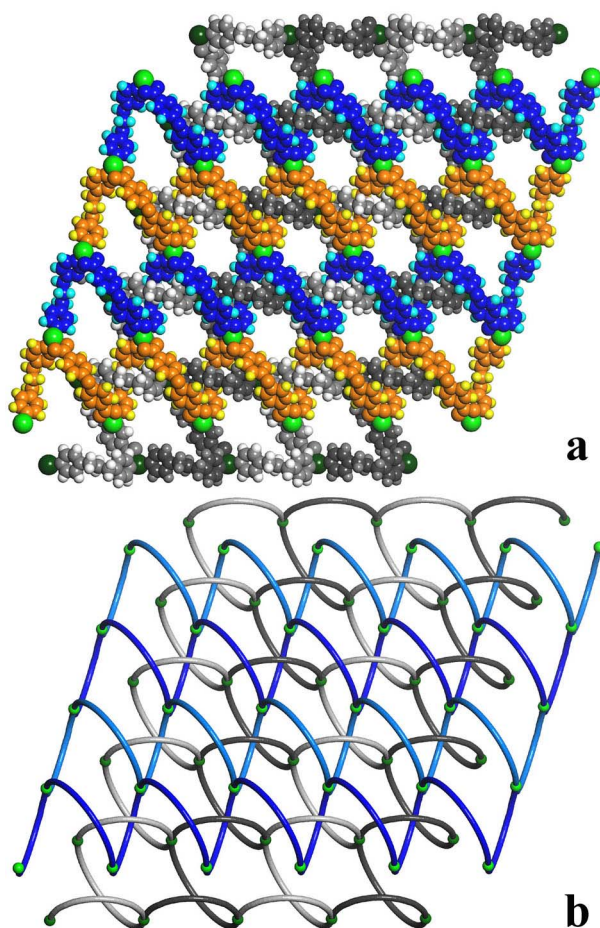

**Fig. S6.** a) View of the space-filling plot of an interpenetrated double-layer in **2** (the organic molecules have been differentiated by colours for better representation). b) Schematic view of the twofold anti-parallel interpenetration of a double-layer.

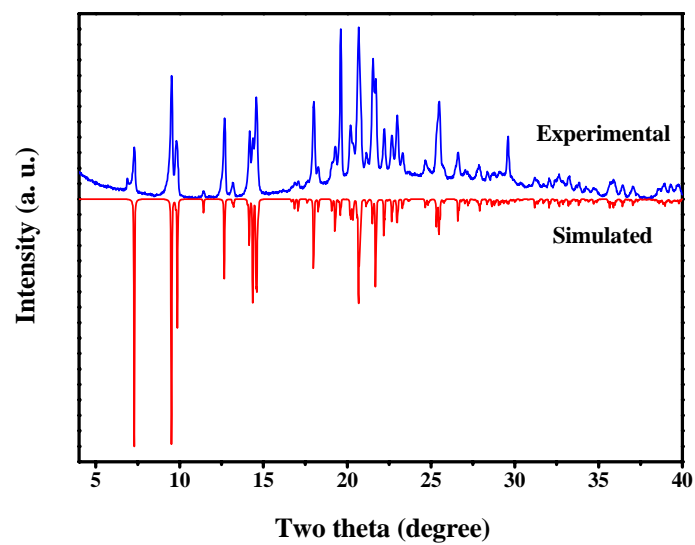

Fig. S7. Experimental and simulated XRD patterns for 1.

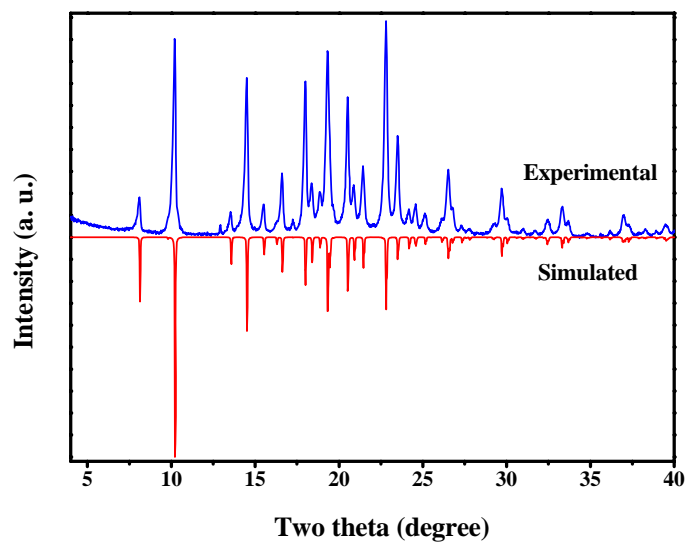

Fig. S8. Experimental and simulated XRD patterns for 2.

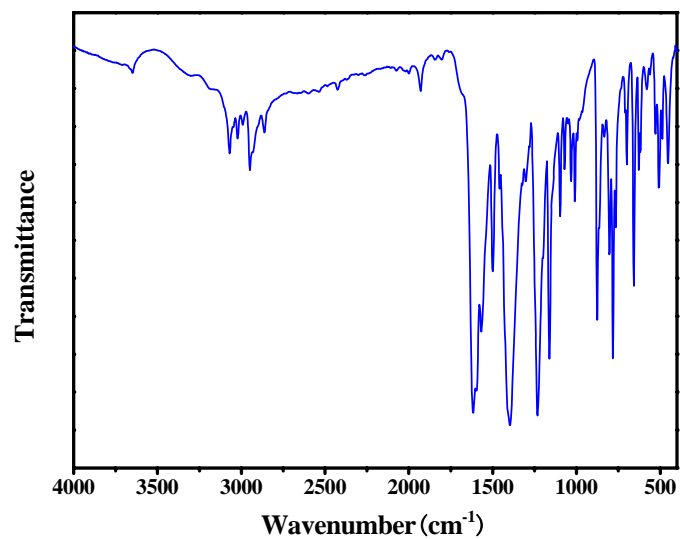

**Fig. S9.** Infrared spectrum of **1**.

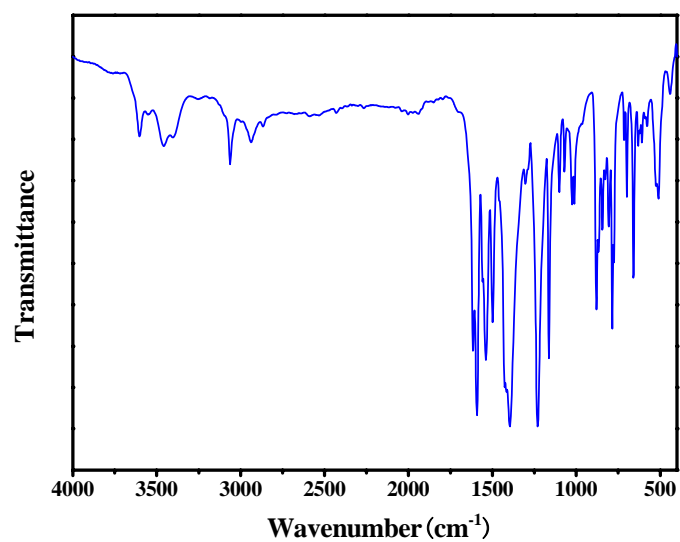

**Fig. S10.** Infrared spectrum of **2**.
